# Supplementary material for: Archerfish number discrimination
Source: eLife. 2022 Jan 10;11:e74057. doi: 10.7554/eLife.74057 (PMC8786312; doi:10.7554/eLife.74057)
Supplement: Figure 6—source data 1. [file elife-74057-fig6-data1.xlsx]

## Sheet: Sheet1
	EXPERIMENT 1	CONGRUITY LEVELS					CHOICE ESTIMATE
	TRAINING	COMPARISONS	REWARD	P-VALUES			LOW95	HIGH95
		Level 1- level2	3 DOTS	0.21		level 1	-0.04	0.24
		level 1- level 3	3 DOTS	0.44		level 2	0.13	0.4
		level 2- level 3	3 DOTS	0.81		level 3	0.08	0.35
		Level 1- level2	6 DOTS	0.82		level 1	0.72	0.94
		level 1- level 3	6 DOTS	0.94		level 2	0.75	0.98
		level 2- level 3	6 DOTS	0.63		level 3	0.71	0.93
	EXPERIMENT 1	CONGRUITY LEVELS					CHOICE ESTIMATE
	TEST	COMPARISONS	REWARD	P-VALUES			LOW95	HIGH95
		Level 1- level2	3 DOTS	0.43		level 1	0.13	0.43
		level 1- level 3	3 DOTS	1		level 2	0.003	0.302
		level 2- level 3	3 DOTS	0.39		level 3	0.14	0.43
		Level 1- level2	6 DOTS	0.91		level 1	0.64	0.86
		level 1- level 3	6 DOTS	0.82		level 2	0.67	0.89
		level 2- level 3	6 DOTS	0.59		level 3	0.6	0.81
	EXPERIMENT 2	CONGRUITY LEVELS					CHOICE ESTIMATE
	TRAINING	COMPARISONS	REWARD	P-VALUES			LOW95	HIGH95
		Level 1- level2	3 DOTS	0.73		level 1	0.66	0.78
		level 1- level 3	3 DOTS	0.33		level 2	0.69	0.8
		level 2- level 3	3 DOTS	0.73		level 3	0.72	0.83
	EXPERIMENT 2	CONGRUITY LEVELS					CHOICE ESTIMATE
	TEST	COMPARISONS	REWARD	P-VALUES			LOW95	HIGH95
		Level 1- level2	3 DOTS	0.49		level 1	0.56	0.78
		level 1- level 3	3 DOTS	0.95		level 2	0.64	0.86
		level 2- level 3	3 DOTS	0.65		level 3	0.58	0.8
